# Supplementary material
Source: PubMed Central journal article supplement (PMC3993312)
Supplement: AEM.03416-13_zam999105289so1.pdf [file AEM.03416-13_zam999105289so1.pdf]

## SUPPLEMENTAL MATERIAL

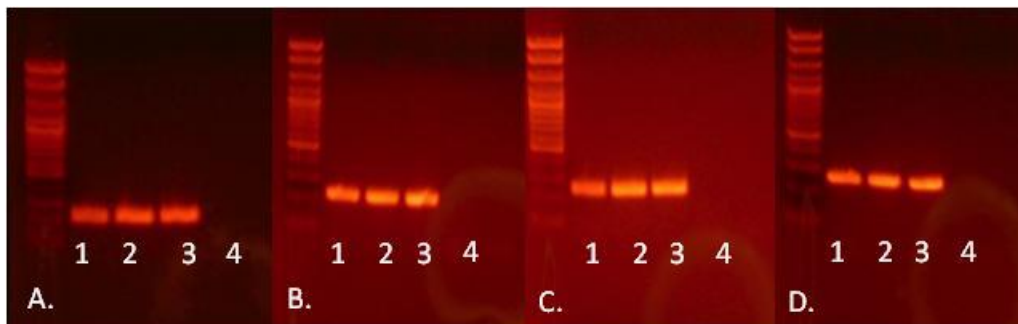

Figure S1. Amplification of 3-HP/4-HB marker genes: A) *hcd*; B) *accC*; C) *accB*; D) *pccB*. Lanes 1 & 2 = *M. yellowstonensis*; Lane 3 = Fe(III)-oxide mat environmental sample; Lane 4 = Negative *E. coli* control; Lane 5 = Reagent blank.

**Table S1.** Protein coding genes of the 3-hydroxypropionate/4-hydroxybutyrate cycle identified in the *M. yellowstonensis* strain MK1 genome and *M. yellowstonensis*-like *de novo* assemblies from the OSP Fe(III)-oxide mat metagenomes.

| Enzymes of the Proposed 3-hydroxypropionate/4-hydroxybutyrate cycle | Candidate gene in <i>M. sedula</i> (9,33) | Candidate enzyme in <i>M. yellowstonensis</i> , identified through BLASTp homology to <i>M. sedula</i> - Accession (expect value, % positives) | Candidate enzyme in <i>M. yellowstonensis</i> -like HFO metagenome sequences, identified through BLASTp homology to <i>M. sedula</i> - IMG Gene ID <sup>a</sup> (expect value, % positives) |
|---------------------------------------------------------------------|-------------------------------------------|------------------------------------------------------------------------------------------------------------------------------------------------|---------------------------------------------------------------------------------------------------------------------------------------------------------------------------------------------|
| acetyl-CoA carboxylase                                              | msed_0147/msed_0148/msed_1375             | EHP69328.1 (0.0, 93%) / EHP69329.1 (4e-100, 94%) / EHP68101.1 (0.0, 97%)                                                                       | 152750 (0.0, 94%) / 152760 (2e-99, 94%) / 60850 (0.0, 97%)                                                                                                                                  |
| malonyl-CoA reductase (NADPH)                                       | msed_0709                                 | EHP70731.1 (0.0, 95%)                                                                                                                          | 143020 (1e-138, 97%)                                                                                                                                                                        |
| malonate semialdehyde reductase (NADPH)                             | msed_1993                                 | EHP68707.1 (2e-173, 87%)                                                                                                                       | 79160 (6e-166, 88%)                                                                                                                                                                         |
| 3-hydroxypropionyl-CoA synthetase (AMP-forming)                     | msed_1456                                 | EHP68110.1 (0.0, 95%)                                                                                                                          | 60890 (0.0, 96%)                                                                                                                                                                            |
| 3-hydroxypropionyl-CoA dehydratase                                  | msed_2001                                 | EHP68697.1 (6e-144, 89%)                                                                                                                       | 78860 (1e-121, 89%)                                                                                                                                                                         |
| acryloyl-CoA reductase (NADPH)                                      | msed_1426                                 | EHP70486.1 (0.0, 90%)                                                                                                                          | 183700 (4e-180, 90%)                                                                                                                                                                        |
| propionyl-CoA carboxylase                                           | msed_0147/msed_0148/msed_1375             | EHP69328.1 (0.0, 93%) / EHP69329.1 (4e-100, 94%) / EHP68101.1 (0.0, 97%)                                                                       | 152750 (0.0, 94%) / 152760 (2e-99, 94%) / 60850 (0.0, 97%)                                                                                                                                  |
| methylmalonyl-CoA epimerase                                         | msed_0639                                 | EHP70648.1 (7e-80, 91%)                                                                                                                        | 71510 (3e-79, 91%)                                                                                                                                                                          |
| methylmalonyl-CoA mutase                                            | msed_0638/msed_2055                       | EHP70647.1 (0.0, 95%) / EHP68637.1 (5e-80, 94%)                                                                                                | 154270 (2e-175, 93%) / 28150 (6e-70, 94%)                                                                                                                                                   |
| succinyl-coA reductase (NADPH)                                      | msed_0709                                 | EHP70731.1 (0.0, 95%)                                                                                                                          | 143020 (1e-138, 97%)                                                                                                                                                                        |
| succinate semialdehyde reductase (NADPH)                            | msed_1424                                 | EHP70477.1 (0.0, 93%)                                                                                                                          | 57730 (0.0, 93%)                                                                                                                                                                            |
| 4-hydroxybutyryl-CoA ligase (AMP-forming)                           | msed_0394, msed_0406                      | EHP71147.1 (0.0, 88%), EHP69042.1 (0.0, 87%)                                                                                                   | 39960 (0.0, 89%), 155470 (0.0, 88%)                                                                                                                                                         |
| 4-hydroxybutyryl-CoA dehydratase, Type I                            | msed_1321                                 | EHP69763.1 (0.0, 97%)                                                                                                                          | 44600 (0.0, 98%)                                                                                                                                                                            |
| crotonyl-CoA hydratase                                              | msed_0399                                 | EHP69048.1 (0.0, 81%)                                                                                                                          | 155420 (0.0, 82%)                                                                                                                                                                           |
| 3-hydroxybutyryl-CoA dehydrogenase                                  | msed_0399                                 | EHP69048.1 (0.0, 81%)                                                                                                                          | 155420 (0.0, 82%)                                                                                                                                                                           |
| acetoacetyl-CoA-B-ketothiolase                                      | msed_0656                                 | EHP70668.1 (0.0, 88%)                                                                                                                          | 71440 (0.0, 88%)                                                                                                                                                                            |

"/" separates subunits of enzyme complex, "," separates proposed candidate genes

<sup>a</sup> Actual IMG Gene ID is formatted as "YNPsite14\_CeleraDRAFT\_" followed by the ID-number reported

**Table S2.** Major ion constituents used in synthetic media for growth experiments using *M. yellowstonensis* strain MK1.

| <b><u>Cations</u></b> | <b><u>uM</u></b> | <b><u>Anions</u></b> | <b><u>uM</u></b> |
|-----------------------|------------------|----------------------|------------------|
| Na                    | 15800            | NO <sub>3</sub>      | 400              |
| K                     | 1547             | SO <sub>4</sub>      | 1212             |
| Al                    | 114              | Cl                   | 10642            |
| Mg                    | 12               | PO <sub>4</sub>      | 100              |
| NH <sub>4</sub>       | 600              | F                    | 147              |
| Ca                    | 250              | B                    | 717              |
|                       |                  | CO <sub>3</sub>      | 5000             |
| C:N:P                 | 50:10:01         |                      |                  |
